# Supplementary material
Source: PubMed Central journal article supplement (PMC3196074)

## Supplemental Information

### INV A PROTEIN: A NUDIX HYDROLASE REQUIRED FOR INFECTION BY PATHOGENIC *LEPTOSPIRA* IN CELL LINES AND ANIMALS\*

Yihui Luo<sup>1,2,7</sup>, Yan Liu<sup>3,7</sup>, Dexter Sun<sup>4</sup>, David M. Ojcius<sup>5</sup>, Jinfang Zhao<sup>1,2</sup>, Xuai Lin<sup>1,2</sup>, Dong Wu<sup>3</sup>, Rongguang Zhang<sup>3</sup>, Ming Chen<sup>6</sup>, Lanjuan Li<sup>1</sup>, Jie Yan<sup>1,2</sup>

### Supplemental Experimental Procedures

*Leptospiral strains* - Information about the leptospiral strains used in this study are presented in Table S1.

*Primers*- All the primers used in this study were synthesized by Invitrogen Co. Shanghai, China (Table S2).

*Amplification and sequence analysis of invA genes in different leptospiral strains*- Leptospiral DNA was extracted using a Bacterial Genomic DNA Extraction Kit (BioColor, Shanghai, China) and then dissolved in TE buffer. The density and purity of the extracted DNAs were measured by UV spectrophotometry. With a High Fidelity PCR Kit (TaKaRa, Dalian, China), in which the Taq-Pfu mixture was used as DNA polymerase, one pair of the primers N1F and N1R (Table S2) was used to amplify the entire *invA* gene. The product was detected in 1.5% ethidium bromide pre-stained agarose gels after electrophoresis. To obtain more accurate sequencing data, the PCR products were purified using a PCR Products Purification Kit (BioColor) and then ligated into plasmid pMD18-T using a T-A Cloning Kit (TaKaRa). The cloned *invA* genes from the leptospiral strains were sequenced by Invitrogen Co. (Shanghai, China). A phylogenetic tree from comparison among the actual Inva sequence of *L. interrogans* strain Lai and the sequences of other characterized microbial Nudix enzymes were analyzed using MEGA 4.0 software [1].

### Supplemental References

1. Kumar, S., Nei, M., Dudley, J., and Tamura, K. (2008). MEGA: a biologist-centric software for evolutionary analysis of DNA and protein sequences. *Brief Bioinform.* **9**(4), 299-306.

## FIGURE LEGENDS

**Fig. S1. Strategy for generation of the *invA*<sup>-</sup> mutant and *invA*<sup>com</sup> revertant based on homologous recombination.**

LA3978/P in the figure means that the DNA segment is composed of LA3978 gene and the promoter of *invA*-LA3976-LA3975 operon. See Methods for details.

**Fig. S2. Distribution and sequencing of *invA* genes from *L. interrogans* species.**

A: Detection of *invA* genes in different *Leptospira* species by PCR.

Lane M: DNA ladder (TaKaRa); Lane 1: blank control; Lanes 2 to 16: *invA* gene fragments amplified from the ten *L. interrogans* strains belonging to serovars Lai, Canicoda, Pyrogenes, Autumnalis, Australis, Pomona, Grippotyphosa, Hebdomadis, Paidjan and Wolffi, four *L. borgpetersenii* strains belonging to serovars Javanica, Ballum, Tarassovi and Mini, and one *L. weilii* strain belonging to serovar Manhao 2. Lanes 17 and 18: negative PCR results for the *L. biflexa* strains belonging to serovars Pactoc and Andamana.

B: Sequences of *invA* genes from different *Leptospira* species.

(1): Nucleotide and amino acid sequences of *invA* genes from the ten *L. interrogans* strains belonging to serovars Lai, Canicoda, Pyrogenes, Autumnalis, Australis, Pomona, Grippotyphosa, Hebdomadis, Paidjan and Wolffi, and four *L. borgpetersenii* strains belonging to serovars Javanica, Ballum, Tarassovi and Mini. (2): Nucleotide and amino acid sequences of the *invA* gene from the *L. weilii* strain belonging to serovar Manhao 2. The underlined areas indicate the primer positions.

**Fig. S3. Comparison of motif and phylogenesis among leptospiral InvA and other Nudix hydrolases.**

A: Nudix motif and multiple alignments of leptospiral InvA and other bacterial Nudix hydrolases. The closest matches are to *R. prowazekii* InvA (No. Q9ZDT9 in NCBI), *B. bacilliformis* IalA (No. P35640 in NCBI), *H. pylori* NudA (No. O25826 in NCBI), *C. jejuni* dinucleoside oligophosphate hydrolase (No. Q9PHT5 in NCBI), *E. coli* YgdP (No. POA776 in NCBI), *P. aeruginosa* invasion protein homolog (No. Q9X4P2 in NCBI), *N. meningitidis* Ap<sub>4</sub>A pyrophosphatase (No. Q9JT78 in NCBI), *H. influenzae* InvA (No. Q57045 in NCBI) and *S. typhimurium* hydrolase (No. P65555 in NCBI). The Nudix motif is indicated by "\*", and identical amino acids are marked with a black background.

B: Molecular phylogenetic relationship between leptospiral InvA and other bacterial Nudix hydrolases.

Table S1. Leptospiral strains used in this study

| Strains | Serovars      | Serogroups          | Genospecies              |
|---------|---------------|---------------------|--------------------------|
| Lai     | Lai           | Icterohaemorrhagiae | <i>L. interrogans</i>    |
| Lin     | Canicola      | Canicola            | <i>L. interrogans</i>    |
| Tian    | Pyrogenes     | Pyrogenes           | <i>L. interrogans</i>    |
| Lin 4   | Autumnalis    | Autumnalis          | <i>L. interrogans</i>    |
| 65-9    | Australis     | Australis           | <i>L. interrogans</i>    |
| Luo     | Pomona        | Pomona              | <i>L. interrogans</i>    |
| Lin 6   | Grippotyphosa | Grippotyphosa       | <i>L. interrogans</i>    |
| P 7     | Hebdomadis    | Hebdomadis          | <i>L. interrogans</i>    |
| L 37    | Paidjan       | Bataviae            | <i>L. interrogans</i>    |
| L 183   | Wolffi        | Sejroe              | <i>L. interrogans</i>    |
| M 10    | Javanica      | Javanica            | <i>L. borgpetersenii</i> |
| Pishu   | Ballum        | Ballum              | <i>L. borgpetersenii</i> |
| 55-52   | Tarassovi     | Tarassovi           | <i>L. borgpetersenii</i> |
| Nan 10  | Mini          | Mini                | <i>L. borgpetersenii</i> |
| L 105   | Manhao 2      | Manhao              | <i>L. weilii</i>         |
| Patoc I | Patoc         | Semaraga            | <i>L. biflexa</i>        |
| CH11    | Andamana      | Andamana            | <i>L. biflexa</i>        |

Table S2. Primers used in this study

| Primer | Sequence (5' to 3')                                                                          | Target                                                                                     | Size (bp)    |
|--------|----------------------------------------------------------------------------------------------|--------------------------------------------------------------------------------------------|--------------|
| N1     | F: CGCCATATG (Nde I) GACAAACCTACCGA<br>R: CGCCTCGAG (Xho I) CGATCTATTTCCGATGTC               | <i>invA</i> gene detection and cloning                                                     | 486          |
| N2     | F: AAGATTCACCTTTAAAATTTAA<br>R: ATCATGAGAAATACGAAAACC                                        | Identification of <i>invA</i> <sup>-</sup> mutant and <i>invA</i> <sup>com</sup> revertant | 4080<br>4741 |
| N3     | F: ATG GAC AAA CCC TAC CGA<br>R: TGG AAA TTG CCA AGA ACC                                     | <i>invA</i> mRNA detection by qPCR                                                         | 150          |
| K      | F: CGCGGATCC (BamH I) ATCGGCTCCGTCGATACTATG<br>R: agaatcgatattatagtaggCATCAGAGTATGGACAGTTGC  | Amplification of <i>kan</i> cassette                                                       | 1062         |
| L1     | F: CGCGTTCGAC (Sal I) CTAATTTCTTTTCGATTGGATC<br>R: agtgggataaaaaaggacatACGAATAAGCTCCCGTTAACT | 5'-homologous arm for <i>invA</i> gene knock-out                                           | 977          |
| L2     | F: agttaacgggagcttattcgtATGTCCTTTTTTATCCACCT<br>R: CGCGGATCC (BamH I) TCATTTCTTAATTTCAAAGT   | Amplification of LA3976 -LA3975 genes                                                      | 715          |
| S      | F: CGCGGATCC (BamH I) AACGCGTCCGAGCTTCAAGG<br>R: agaatcgatattatagtaggAACGCGTAAAGTAAGCACCTG   | Amplification of <i>spc</i> cassette                                                       | 1235         |
| L3     | F: gcaactgtccatactctgatgCCTACGTATAATATCGATTCT<br>R: CGCGGTACC (Kpn I) GAAATCATAACGACCCTGGAAG | 3'-homologous arm for <i>invA</i> gene knock-out                                           | 1086         |
| L4     | F: caggtgcttactttacgcttCCTACGTATAATATCGATTCT<br>R: CGCGGTACC (Kpn I) GAAATCATAACGACCCTGGAAG  | 3'-homologous arm for <i>invA</i> gene reversion                                           | 1086         |
| 16S    | F: CTTTCGTGCCTCAGCGTCAGT<br>R: CGCAGCCTGCACCTTGAAACTA                                        | 16S rRNA for internal reference in qPCR                                                    | 145          |
| LA3976 | F: CGGTCCACCTTTGTATTCTCAA<br>R: AAACCTCCGCATCCCAATCGTC                                       | Detection for mRNA level of LA3976 gene by qPCR                                            | 140          |
| LA3975 | F: GCTAAGCGGTTATACTCAA<br>R: TCTTCCCAAGTAATCAGG                                              | Detection for mRNA level of LA3975 gene by qPCR                                            | 147          |

F: forward primer; R: reverse primer. Letters in lowercase indicate linking sequences.

# Supplemental Figure S1

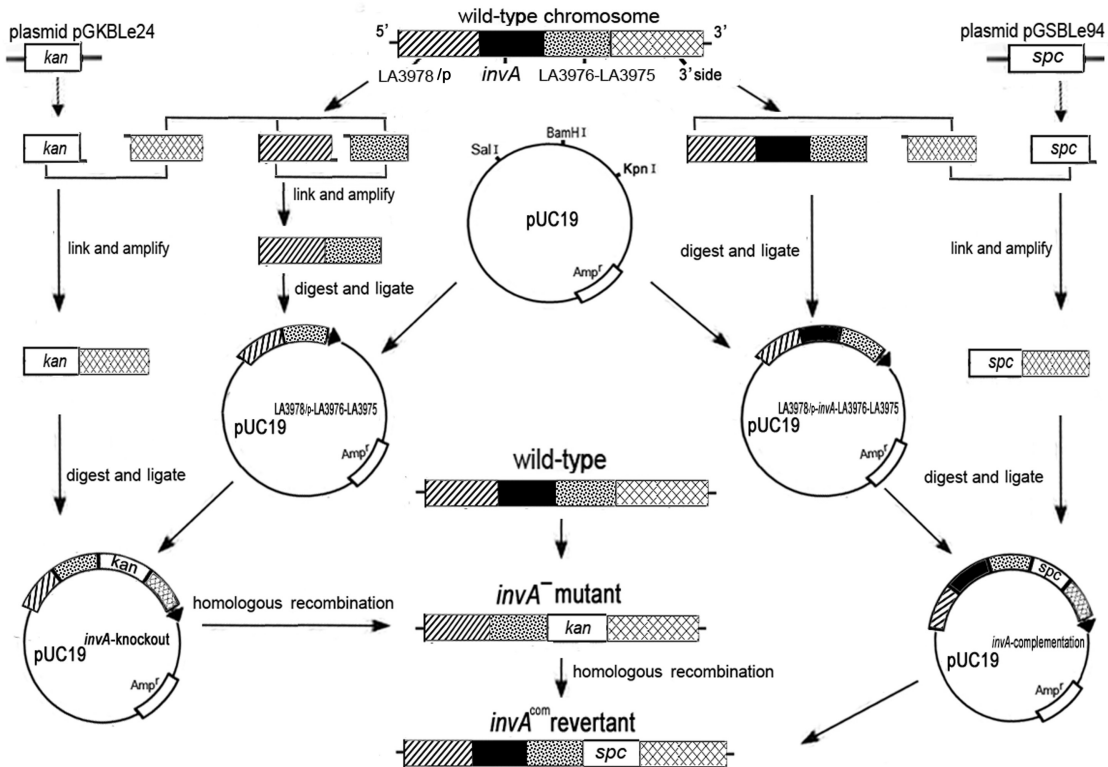

# Supplemental Figure S2

**A**

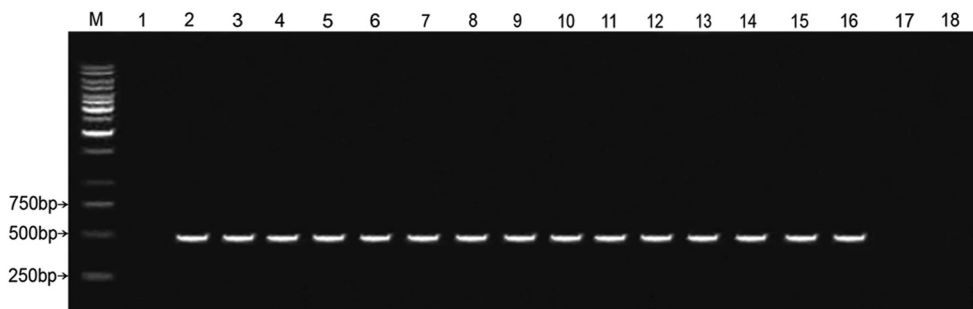

**B**

## Nucleotide sequence

```

(1) 1   ATGGACAAACCCTACCGAAAAAATGTCGGGATGGTCGTATTTAACTCTCGTGGAGAGGTT
(2) 1   .....

(1) 61  TTGGTTGGAGAAAAGATTGAATTTTCTAGGTTCTTGGCAATTTCCACAAGGTGGAATTGAC
(2) 61  .....

(1) 121 GACGATGAAGATCCGATCAAGGCAGCCATGAGAGAATTATATGAAGAAGTCGGAATCGAT
(2) 121 .....

(1) 181 TCTGGAAAAATCGTAGCTGAATATCCAGATTGGATTTCCTATGACTTTC CGGAAAAACCTT
(2) 181 ..... T.....

(1) 241 CCTCTAAACCGTCATCTTCAAAAAATATAGGGGGCAACTTCAAAAGTGTTTCTTATCTAT
(2) 241 .....

(1) 301 TGGGACGGGGAAGTGGATCAATGTGATTTGGATATTTCATGAAAGAGAATTGGAACGGTT
(2) 301 ..... A.....

(1) 361 CGTTTTATTCTATAAAAAACAGTTGAATACAGTCGTTCCCTTTAAAAAAGATGTATAT
(2) 361 .....

(1) 421 TATAAAATTGTAATGACTTTGGGCCTAAGATCCAAAACCTTTTGAAGACATCGGAAAT
(2) 421 ..... A.....

(1) 481   AGATCGTAA
(2) 481   .....
  
```

## Amino acid sequence

```

(1) 1   MDKPYRKNVGMVVFNSRGEVLVGERLNFGLGSWQFPQGGIDDEDPIKAAMRELYEEVGIID
(2) 1   .....

(1) 61  SGKIVAEYPDWISYDFPENLPLNRHLQKYRQLQKWFLLIYWDGEVDQCDDLDIHEREFGTV
(2) 61  ..... F.....

(1) 121 RFIPIKNTLNTVVVFPKQDVYYKIVNDFGPKIQNFLQDIGNRS
(2) 121 ..... E.....
  
```

# Supplemental Figure S3

**A**

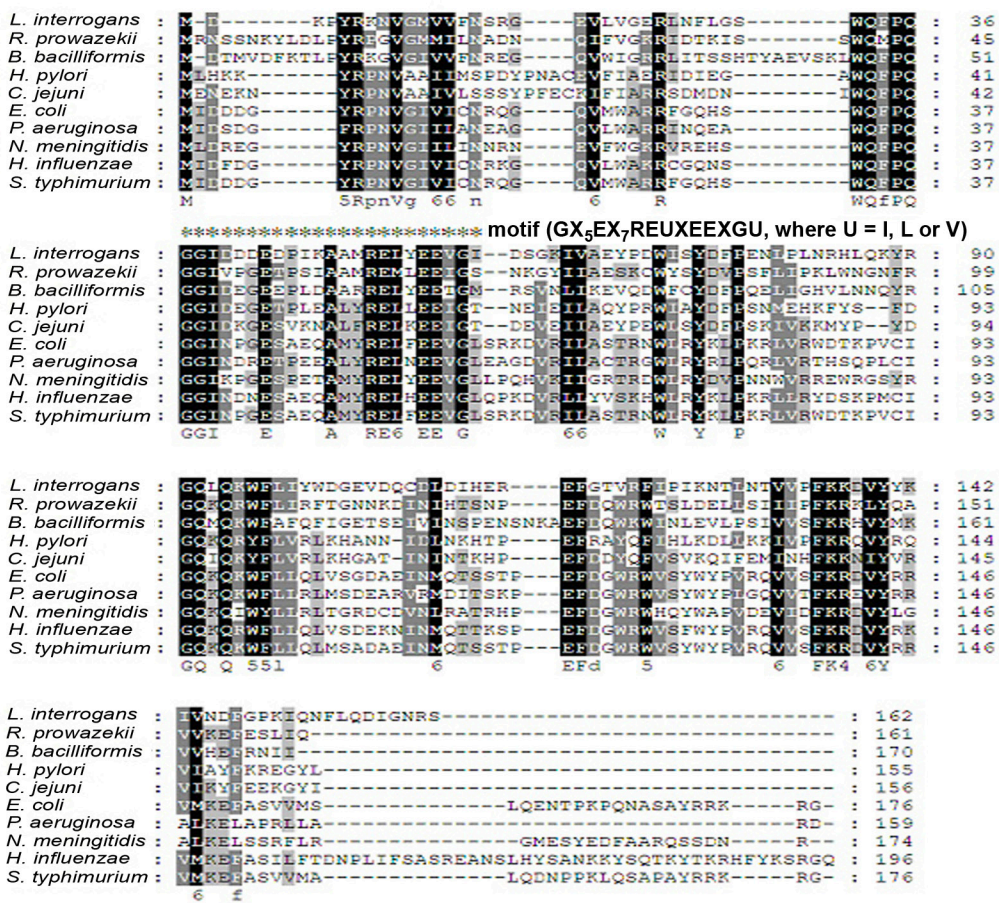

**B**

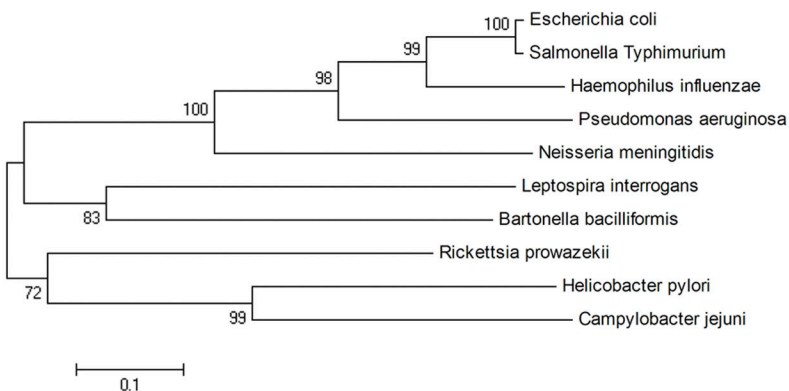

Supplement: supp_M111.219931_jbc.M111.219931-1.pdf [file supp_M111.219931_jbc.M111.219931-1.pdf]
